# Supplementary material
Source: Copernicus journal article supplement (doi:10.5194/egusphere-2026-3154)
Supplement: Supplementary file 1 [file egusphere-2026-3154-supplement.pdf]

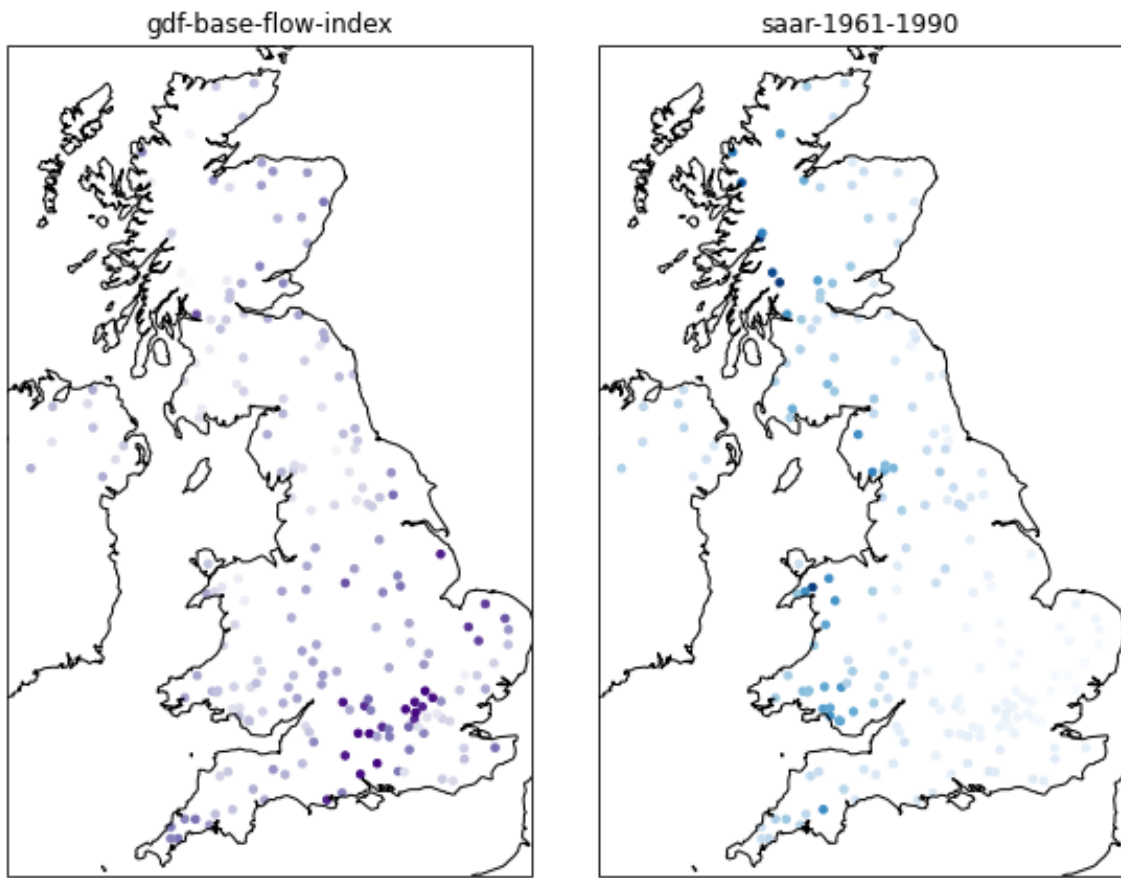

**Figure S1** – Base Flow Index (BFI) and catchment average rainfall (Standard Period Average Annual Rainfall, SAAR 1961-1990) for stations included in eFLaG. Darker colours indicate higher values.

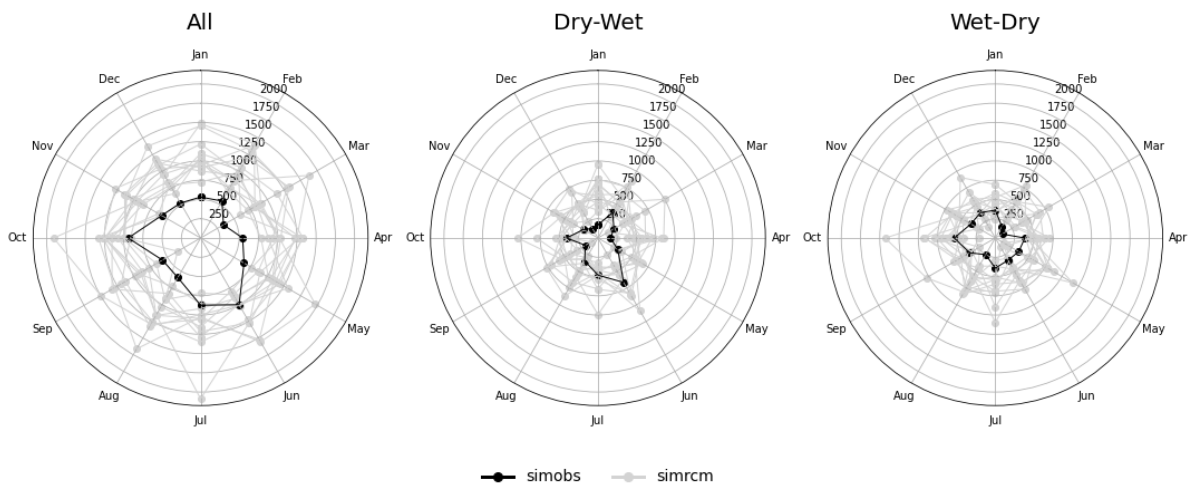

**Figure S2** – Seasonality of severe (threshold  $\pm 1.6$ ) dry-wet and wet-dry hydrological (SSI) transitions in the baseline period (1989–2018) for SimObs and each ensemble member of SimRCM, shown by a count of transition events occurring in each calendar month, using transition end month.

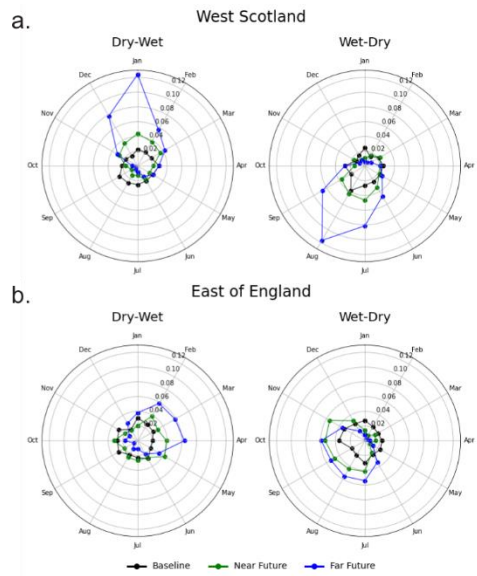

**Figure S3** – Seasonality of severe (threshold  $\pm 1.6$ ) hydrological (SSI) transitions using SimRCM for all models, shown as a fraction of transition events ending in each calendar month for baseline, near future and far future periods for dry-wet and wet-dry transitions

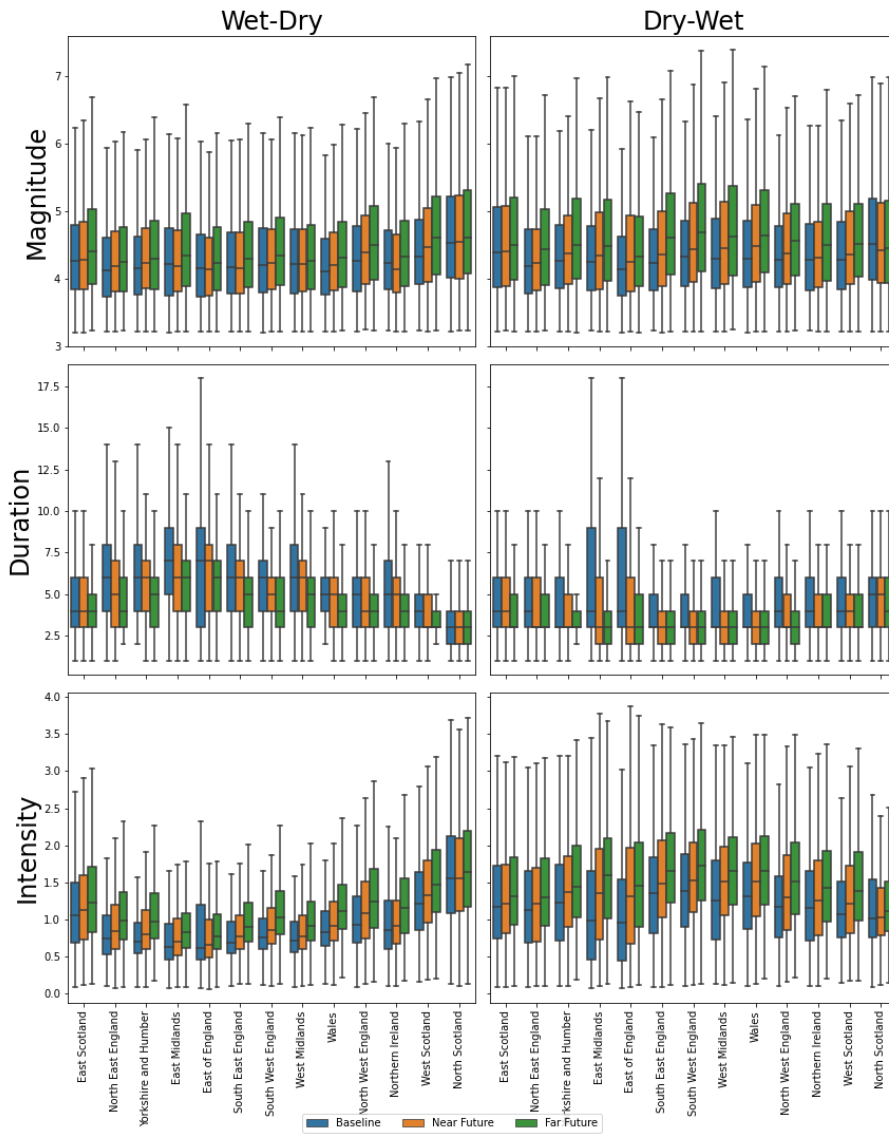

**Figure S4** – Boxplot representing region-averaged magnitude (no units), duration (months) and intensity (no units) of severe (threshold  $\pm 1.6$ ) wet-dry and dry-wet meteorological (SPI) transitions for baseline, near future and far future with SimRCM. The spread of the boxplots (ranging from 5-95<sup>th</sup> percentile, without outliers) represents the 12 RCM scenarios. For the equivalent plot for hydrological (SSI) transitions see Figure 8.
